# Supplementary material for: Screening effect of CVD graphene on the surface free energy of substrates
Source: Royal Society of Chemistry journal article supplement (doi:10.1039/d0cp01453b), 2020-01-01
Supplement: d0cp01453b1.xlsx [file d0cp01453b1.xlsx]

## Sheet: OWRK geometric mean
		g	gp	gd		QUARTZ - uncoated - thermal treatment																														Média		Desvio Padrão			TETA 1	TETA 2
Liquid 1	WATER	72.8	51	21.8																																gd1	#REF!		#REF!		52.032	38.7531
Liquid 2	ETHYLENE GLYCOL	48	19	29																																gd2	#REF!		#REF!		0.340369	0.603516
					q1	q2	y1	y2	X1	X2	b	a	gd	gp	SFE			gd	gp	SFE
					51.8373	37.9536	12.6132	7.97083	1.52953	0.809427	6.44679	2.75262	7.5769	41.5611	49.138		Average	7.263	41.8863	49.1493
x1 constant					51.7835	38.097	12.6189	7.96396	1.52953	0.809427	6.46433	2.73155	7.46139	41.7875	49.2489		Stand Desv	0.437199	0.921356	0.508099
1.52953					51.7636	38.2023	12.621	7.9589	1.52953	0.809427	6.4743	2.71842	7.38981	41.9166	49.3064
					51.74	38.1469	12.6236	7.96156	1.52953	0.809427	6.47411	2.72124	7.40514	41.9141	49.3192
x2 constant					51.7709	38.1683	12.6203	7.96053	1.52953	0.809427	6.47096	2.72276	7.41344	41.8733	49.2867
0.809427					51.746	38.0729	12.6229	7.96511	1.52953	0.809427	6.46829	2.7295	7.45019	41.8388	49.289
					51.7802	38.2192	12.6193	7.95808	1.52953	0.809427	6.47297	2.71868	7.39123	41.8994	49.2906
					51.7632	38.1849	12.6211	7.95973	1.52953	0.809427	6.4732	2.72015	7.3992	41.9024	49.3016
					51.7589	38.2346	12.6215	7.95734	1.52953	0.809427	6.47717	2.71454	7.36873	41.9538	49.3225
		Ilustrative example			51.7283	38.3446	12.6248	7.95204	1.52953	0.809427	6.48908	2.69961	7.28787	42.1081	49.396
					51.6886	38.3561	12.629	7.95149	1.52953	0.809427	6.49572	2.69367	7.25586	42.1944	49.4503
					51.6986	38.3253	12.628	7.95297	1.52953	0.809427	6.49218	2.69802	7.27933	42.1484	49.4278
					51.7032	38.5196	12.6275	7.94358	1.52953	0.809427	6.50454	2.67862	7.17503	42.3091	49.4841
					51.6521	38.286	12.633	7.95487	1.52953	0.809427	6.49645	2.69647	7.27093	42.2038	49.4748
					51.6555	38.3574	12.6326	7.95142	1.52953	0.809427	6.50073	2.68955	7.23368	42.2595	49.4932
					51.6502	38.2747	12.6331	7.95541	1.52953	0.809427	6.49597	2.6974	7.27595	42.1976	49.4736
					51.6218	38.2823	12.6362	7.95505	1.52953	0.809427	6.50069	2.69321	7.2534	42.2589	49.5123
					51.6024	38.3708	12.6382	7.95078	1.52953	0.809427	6.50948	2.68182	7.19218	42.3734	49.5655
					51.5832	38.3588	12.6403	7.95135	1.52953	0.809427	6.51153	2.68074	7.18639	42.4	49.5864
					51.5767	38.3473	12.641	7.95191	1.52953	0.809427	6.51172	2.68115	7.18855	42.4025	49.591
					52.0254	39.4453	12.593	7.89828	1.52953	0.809427	6.51957	2.62117	6.87053	42.5047	49.3753
					51.9972	39.4889	12.596	7.89613	1.52953	0.809427	6.52676	2.6132	6.82879	42.5985	49.4273
					51.9965	39.4598	12.5961	7.89756	1.52953	0.809427	6.52486	2.61616	6.84432	42.5738	49.4181
					52.0089	39.5245	12.5948	7.89437	1.52953	0.809427	6.52746	2.61086	6.8166	42.6078	49.4244
					51.9747	39.4701	12.5984	7.89706	1.52953	0.809427	6.52881	2.61246	6.82494	42.6254	49.4503
					51.9543	39.5096	12.6006	7.8951	1.52953	0.809427	6.53456	2.60585	6.79047	42.7005	49.4909
					51.9706	39.4971	12.5989	7.89572	1.52953	0.809427	6.53127	2.60913	6.80757	42.6575	49.4651
					51.9199	39.6193	12.6043	7.88967	1.52953	0.809427	6.54723	2.59016	6.70895	42.8662	49.5751
					51.9092	39.5897	12.6055	7.89114	1.52953	0.809427	6.54678	2.592	6.71844	42.8603	49.5788
					51.9053	39.6356	12.6059	7.88886	1.52953	0.809427	6.55053	2.58668	6.69092	42.9094	49.6004
					51.857	39.6874	12.611	7.88629	1.52953	0.809427	6.56126	2.57542	6.63281	43.0502	49.683
					51.8377	39.6529	12.6131	7.888	1.52953	0.809427	6.56176	2.57673	6.63954	43.0567	49.6963
					51.8413	39.6468	12.6127	7.8883	1.52953	0.809427	6.56081	2.5778	6.64507	43.0443	49.6893
					51.8151	39.6554	12.6155	7.88788	1.52953	0.809427	6.56529	2.57376	6.62423	43.103	49.7272
					51.808	39.6406	12.6163	7.88861	1.52953	0.809427	6.56532	2.57446	6.62783	43.1035	49.7313
					51.8204	39.6448	12.615	7.8884	1.52953	0.809427	6.56378	2.5755	6.63323	43.0832	49.7164
					51.8052	39.6579	12.6166	7.88775	1.52953	0.809427	6.56693	2.5723	6.61672	43.1246	49.7413
					51.8019	39.6454	12.6169	7.88837	1.52953	0.809427	6.56656	2.57322	6.62145	43.1197	49.7412
					51.8214	39.6771	12.6149	7.8868	1.52953	0.809427	6.56585	2.57222	6.61631	43.1104	49.7267
					51.8099	39.677	12.6161	7.8868	1.52953	0.809427	6.56756	2.57084	6.60923	43.1328	49.7421
					52.3874	38.3334	12.5541	7.95258	1.52953	0.809427	6.3901	2.78026	7.72986	40.8334	48.5632
					52.5991	38.3147	12.5312	7.95348	1.52953	0.809427	6.35712	2.80786	7.88405	40.413	48.297
					52.5885	38.3098	12.5324	7.95372	1.52953	0.809427	6.35838	2.80707	7.87966	40.429	48.3087
					52.565	38.2851	12.5349	7.95491	1.52953	0.809427	6.36026	2.80674	7.8778	40.4529	48.3307
					52.5405	38.293	12.5376	7.95453	1.52953	0.809427	6.36446	2.80296	7.85656	40.5064	48.363
					52.5484	38.2685	12.5367	7.95571	1.52953	0.809427	6.36164	2.80643	7.87603	40.4705	48.3465
					52.5333	38.3914	12.5384	7.94978	1.52953	0.809427	6.37214	2.792	7.79525	40.6042	48.3994
					52.5333	38.3746	12.5384	7.95059	1.52953	0.809427	6.37101	2.79372	7.80488	40.5898	48.3947
					52.5132	38.4163	12.5405	7.94858	1.52953	0.809427	6.37681	2.78701	7.76743	40.6638	48.4312
					52.4649	38.452	12.5457	7.94685	1.52953	0.809427	6.38646	2.77747	7.71435	40.7869	48.5013
					52.4666	38.5021	12.5455	7.94443	1.52953	0.809427	6.38957	2.77254	7.68697	40.8266	48.5135
					52.449	38.484	12.5474	7.9453	1.52953	0.809427	6.39098	2.77227	7.68547	40.8447	48.5301
					52.4448	38.5529	12.5479	7.94197	1.52953	0.809427	6.39625	2.76467	7.64338	40.912	48.5554
					52.4448	38.5573	12.5479	7.94175	1.52953	0.809427	6.39655	2.76421	7.64087	40.9158	48.5567
					52.4086	38.5344	12.5518	7.94286	1.52953	0.809427	6.40042	2.76219	7.62967	40.9654	48.5951
					52.4068	38.4921	12.552	7.94491	1.52953	0.809427	6.39786	2.76631	7.65249	40.9326	48.5851
					52.3995	38.4499	12.5528	7.94696	1.52953	0.809427	6.3961	2.76978	7.67166	40.9101	48.5818
					52.3885	38.4694	12.554	7.94601	1.52953	0.809427	6.39906	2.76644	7.65319	40.948	48.6011
					52.4399	38.4617	12.5484	7.94638	1.52953	0.809427	6.39085	2.77345	7.69204	40.843	48.5351
					52.4089	38.5078	12.5518	7.94415	1.52953	0.809427	6.3986	2.76495	7.64495	40.9421	48.587
					52.4341	38.5586	12.5491	7.94169	1.52953	0.809427	6.39823	2.76279	7.63298	40.9374	48.5704
